# Supplementary material for: Body Fat Distribution and Systolic Blood Pressure in 10,000 Adults with Whole‐Body Imaging: UK Biobank and Oxford BioBank
Source: PubMed Central journal article supplement (PMC6618903; doi:10.1002/oby.22509), 2019-05-13
Supplement: OBY-27-1200-s001.pdf [file OBY-27-1200-s001.pdf]

# **Body fat distribution and systolic blood pressure in 10,000 adults with whole-body imaging: UK Biobank and Oxford Biobank**

Debbie Malden<sup>1</sup>, Ben Lacey<sup>1</sup>, Jonathan Emberson<sup>1,2</sup>, Fredrik Karpe<sup>3,4</sup>, Naomi Allen<sup>1,5</sup>,

Derrick Bennett<sup>2</sup>, Sarah Lewington<sup>1,2,4</sup>

<sup>1</sup>Clinical Trial Service Unit & Epidemiological Studies Unit (CTSU), Nuffield Department of Population Health (NDPH), University of Oxford, UK; <sup>2</sup>MRC Population Health Research Unit, CTSU, NDPH, University of Oxford, UK; <sup>3</sup>The Oxford Centre for Diabetes, Endocrinology and Metabolism (OCDEM), University of Oxford, UK; <sup>4</sup> National Institute for Health Research (NIHR) Oxford Biomedical Research Centre (BRC), Oxford University Hospitals Foundation Trust, Oxford, UK; <sup>5</sup>Cancer Epidemiology Unit (CEU), University of Oxford, Oxford, UK

**Supplementary file**

---

| Table/figure     | Description                                                                                                                                                                    |
|------------------|--------------------------------------------------------------------------------------------------------------------------------------------------------------------------------|
| <b>Table S1</b>  | Exclusion criteria for participants included in analyses, by study                                                                                                             |
| <b>Table S2</b>  | Correlation coefficients between anthropometric measurements at imaging visit and resurvey assessments approximately 2.1 and 7.2 years prior                                   |
| <b>Table S3</b>  | Baseline characteristics by study                                                                                                                                              |
| <b>Table S4</b>  | Adjusted correlation coefficients between selected body size and composition variables                                                                                         |
| <b>Table S5</b>  | BMI, waist circumference and waist-to-hip ratio versus body composition, by sex                                                                                                |
| <b>Figure S1</b> | Mean change in systolic blood pressure (SBP) per 1 standard deviation (SD) higher DXA-derived body composition variable in 10,260 participants, by study and sex               |
| <b>Figure S2</b> | Mean change in systolic blood pressure (SBP) per 1 standard deviation (SD) higher regional body composition after further adjustment for smoking and physical activity, by sex |
| <b>Figure S3</b> | Mean change in systolic blood pressure (SBP) per 1 standard deviation (SD) higher log-transformed body composition, by study and sex                                           |

---

**Table S1. Exclusion criteria for participants of the Oxford Biobank (OBB) and UK Biobank (UKB) imaging studies**

|                                      | Men (n= 4 708) |     |             |             |          |     | Women (n=5 887) |     |             |             |          |     | Total |        |
|--------------------------------------|----------------|-----|-------------|-------------|----------|-----|-----------------|-----|-------------|-------------|----------|-----|-------|--------|
|                                      | Missing        |     | Lower limit | Upper limit | Outliers |     | Missing         |     | Lower limit | Upper limit | Outliers |     | OBB   | UKB    |
|                                      | OBB            | UKB |             |             | OBB      | UKB | OBB             | UKB |             |             | OBB      | UKB |       |        |
| <b>Directly measured</b>             |                |     |             |             |          |     |                 |     |             |             |          |     |       |        |
| Body weight (kg)                     | 0              | 0   | <40kg       | ≥170kg      | 0        | 0   | 0               | 0   | <40kg       | ≥150kg      | 2        | 3   | 2     | 3      |
| Height (cm)                          | 0              | 10  | <140cm      | ≥200cm      | 6        | 0   | 4               | 11  | <140cm      | ≥185cm      | 7        | 2   | 17    | 23     |
| Waist circumference(cm)              | 2              | 10  | <65cm       | ≥150cm      | 2        | 0   | 3               | 10  | <55cm       | ≥140cm      | 5        | 0   | 12    | 20     |
| Hip circumference (cm)               | 2              | 10  | <80cm       | ≥145cm      | 1        | 1   | 4               | 10  | <70cm       | ≥150cm      | 7        | 0   | 14    | 21     |
| Body-mass index (kg/m <sup>2</sup> ) | 0              | 10  | <15         | ≥50         | 0        | 0   | 4               | 11  | <15         | ≥60         | 5        | 2   | 9     | 23     |
| Waist-to-hip ratio                   | 3              | 10  | <0.7        | ≥1.2        | 4        | 0   | 4               | 10  | <0.60       | ≥1.2        | 6        | 0   | 17    | 20     |
| <b>DXA measurements, kg</b>          |                |     |             |             |          |     |                 |     |             |             |          |     |       |        |
| Body fat                             | 0              | 0   | <3kg        | ≥60kg       | 8        | 10  | 0               | 0   | <3kg        | ≥60kg       | 26       | 8   | 34    | 18     |
| Subcutaneous android fat             | 7              | 0   | <0.01kg     | ≥5kg        | 7        | 1   | 11              | 0   | <0.01kg     | ≥5kg        | 17       | 0   | 43    | 1      |
| Visceral android fat                 | 7              | 26  | <0.01kg     | ≥5kg        | 15       | 11  | 11              | 35  | <0.01kg     | ≥5kg        | 141      | 4   | 174   | 76     |
| Subcutaneous gynoid fat              | 0              | 0   | <0.1kg      | ≥15kg       | 0        | 0   | 0               | 0   | <0.1kg      | ≥15kg       | 1        | 0   | 1     | 0      |
| Other fat                            | 7              | 0   | <2kg        | ≥50kg       | 2        | 0   | 0               | 0   | <2kg        | ≥50         | 10       | 0   | 19    | 0      |
| <b>Systolic blood pressure</b>       | 2              | 11  | <80mmHg     | ≥240mmHg    | 1        | 0   | 2               | 8   | <80mmHg     | ≥240mmHg    | 3        | 0   | 8     | 19     |
| <b>Total excluded</b>                |                |     |             |             |          |     |                 |     |             |             |          |     | 198   | 137    |
| <b>Total included</b>                |                |     |             |             |          |     |                 |     |             |             |          |     | 5227  | 5033   |
| <b>Total combined</b>                |                |     |             |             |          |     |                 |     |             |             |          |     |       | 10,260 |

DXA =Dual energy X-ray Absorptiometry

**Table S2. Correlation coefficients between anthropometry measures at imaging visit and resurvey assessments in the UK Biobank approximately 2.1 and 7.2 years prior**

|                            | Self-correlation between 1 <sup>st</sup> resurvey and imaging visit (~2.1 years after) |                |               | Self-correlation between baseline survey and imaging visit (~7.2 years after) |                |               |
|----------------------------|----------------------------------------------------------------------------------------|----------------|---------------|-------------------------------------------------------------------------------|----------------|---------------|
|                            | Men (n=1003)                                                                           | Women (n=1060) | All (n=2063)* | Men (n=2390)                                                                  | Women (n=2643) | All (n=5033)* |
| <b>Height</b>              | 0.99                                                                                   | 0.99           | 0.99          | 0.98                                                                          | 0.98           | 0.98          |
| <b>Weight</b>              | 0.96                                                                                   | 0.95           | 0.96          | 0.93                                                                          | 0.91           | 0.92          |
| <b>Body mass index</b>     | 0.95                                                                                   | 0.95           | 0.95          | 0.91                                                                          | 0.91           | 0.91          |
| <b>Waist Circumference</b> | 0.83                                                                                   | 0.84           | 0.84          | 0.79                                                                          | 0.81           | 0.80          |
| <b>Hip Circumference</b>   | 0.80                                                                                   | 0.86           | 0.84          | 0.78                                                                          | 0.82           | 0.80          |
| <b>Waist-to-hip ratio</b>  | 0.63                                                                                   | 0.65           | 0.64          | 0.62                                                                          | 0.65           | 0.64          |

\*Adjusted for sex. Those with missing or outlying anthropometry, DXA and blood pressure variables were excluded (see Supplementary Table 1).

**Table S3. Baseline characteristics by study**

|                                    | Oxford Biobank (N=5 227) |                 | UK Biobank (n=5 033) |                 |
|------------------------------------|--------------------------|-----------------|----------------------|-----------------|
|                                    | Men (n=2 229)            | Women (n=2 998) | Men (n=2 390)        | Women (n=2 643) |
| <b>Demographic characteristics</b> |                          |                 |                      |                 |
| Mean age, years (SD)               | 41.5 (5.9)               | 41.8 (6.1)      | 63.2 (7.5)           | 61.8 (7.5)      |
| White, n (%)                       | 2 162 (97%)              | 2 878 (96%)     | 2 286 (96%)          | 2 541 (96%)     |
| Professional occupation, n (%)     | 1 515 (68%)              | 1 808 (60%)     | 1 451 (61%)          | 1 371 (52%)     |
| Current smoker, n (%)              | 240 (11%)                | 249 (8%)        | 128 (5%)             | 98 (4%)         |
| Daily drinker, n (%)               | 670 (30%)                | 343 (11%)       | 559 (23%)            | 379 (14%)       |
| <b>Anthropometry, mean (SD)</b>    |                          |                 |                      |                 |
| Height, cm                         | 179.2 (6.6)              | 165.5 (6.2)     | 176 (6.6)            | 162 (6.3)       |
| Weight, kg                         | 85.3 (13.6)              | 69.3 (13.0)     | 83.1 (12.7)          | 68.5 (12.3)     |
| BMI, kg/m <sup>2</sup>             | 26.2 (3.9)               | 25.0 (4.6)      | 26.8 (3.6)           | 26.0 (4.5)      |
| Waist circumference, cm            | 92.8 (10.9)              | 82.5 (11.9)     | 93.4 (9.4)           | 82.1 (11.2)     |
| Hip circumference, cm              | 101.7 (7.1)              | 101.3 (9.3)     | 101.6 (6.8)          | 101.1 (9.4)     |
| Waist-to-hip ratio                 | 0.91 (0.07)              | 0.81 (0.07)     | 0.92 (0.05)          | 0.81 (0.06)     |
| <b>DXA measures, mean (SD)</b>     |                          |                 |                      |                 |
| Fat-free mass, kg                  | 61.4 (7.3)               | 43.9 (5.3)      | 58.5 (6.8)           | 41.8 (4.9)      |
| Percentage body fat, %             |                          |                 |                      |                 |
| Fat mass, kg                       | 22.9 (8.6)               | 24.7 (9.4)      | 24.6 (8.1)           | 26.7 (9.1)      |
| Visceral fat                       | 1.08 (0.76)              | 0.43 (0.43)     | 1.67 (0.91)          | 0.78 (0.57)     |
| Subcutaneous android fat           | 1.10 (0.53)              | 1.43 (0.75)     | 0.98 (0.44)          | 1.42 (0.64)     |
| Subcutaneous gynoid fat            | 3.40 (1.19)              | 4.52 (1.48)     | 3.54 (1.16)          | 4.65 (1.45)     |
| Other fat                          | 17.09 (6.27)             | 18.20 (6.92)    | 18.40 (5.96)         | 19.80 (6.67)    |
| <b>Blood pressure, mean (SD)</b>   |                          |                 |                      |                 |
| Systolic, mmHg                     | 127.2 (12.3)             | 116.6 (12.9)    | 140.3 (16.6)         | 133.4 (18.7)    |
| Diastolic, mmHg                    | 79.0 (9.2)               | 73.5 (9.2)      | 80.6 (9.8)           | 77.4 (9.9)      |

DXA = Dual energy X-ray Absorptiometry; Those with missing or outlying anthropometry, DXA and blood pressure variables were excluded (see Supplementary Table 1)

**Table S4. Adjusted correlation coefficients between selected body size and composition variables**

|                                 | Anthropometry variables |                    | DXA variables |                      |                          |                         |           |      |
|---------------------------------|-------------------------|--------------------|---------------|----------------------|--------------------------|-------------------------|-----------|------|
|                                 | BMI                     | Waist-to-hip ratio | Fat-free mass | Visceral android fat | Subcutaneous android fat | Subcutaneous gynoid fat | Other fat |      |
| <b>Waist circumference</b>      | Male:                   | 0.87               | 0.80          | 0.54                 | 0.80                     | 0.71                    | 0.83      | 0.90 |
|                                 | Female:                 | 0.86               | 0.73          | 0.56                 | 0.83                     | 0.82                    | 0.73      | 0.88 |
| <b>BMI</b>                      | Male:                   |                    | 0.62          | 0.58                 | 0.79                     | 0.67                    | 0.81      | 0.88 |
|                                 | Female:                 |                    | 0.45          | 0.56                 | 0.77                     | 0.85                    | 0.85      | 0.93 |
| <b>Waist-to-hip ratio</b>       |                         |                    | Male:         | 0.24                 | 0.67                     | 0.47                    | 0.52      | 0.66 |
|                                 |                         |                    | Female:       | 0.23                 | 0.62                     | 0.40                    | 0.20      | 0.45 |
| <b>Fat-free mass</b>            |                         |                    | Male:         |                      | 0.37                     | 0.28                    | 0.41      | 0.43 |
|                                 |                         |                    | Female:       |                      | 0.39                     | 0.49                    | 0.52      | 0.53 |
| <b>Visceral android fat</b>     |                         |                    |               |                      | Male:                    | 0.46                    | 0.72      | 0.87 |
|                                 |                         |                    |               |                      | Female:                  | 0.67                    | 0.62      | 0.82 |
| <b>Subcutaneous android fat</b> |                         |                    |               |                      | Male:                    |                         | 0.81      | 0.79 |
|                                 |                         |                    |               |                      | Female:                  |                         | 0.85      | 0.91 |
| <b>Subcutaneous gynoid fat</b>  |                         |                    |               |                      |                          |                         | Male:     | 0.93 |
|                                 |                         |                    |               |                      |                          |                         | Female:   | 0.91 |

DXA=Dual energy X-ray Absorptiometry; Analyses in 10,260 participants (exclusions as in Table 1); Correlation coefficients were adjusted for age (5-year groups).

**Table S5. BMI, waist circumference and waist-to-hip ratio versus body composition, by sex**

| Age- and education-adjusted means (95% CI) |         |      |                    |                          |                         |                        |                        |
|--------------------------------------------|---------|------|--------------------|--------------------------|-------------------------|------------------------|------------------------|
| Men (n=4,619)                              | Level   | N    | Visceral fat       | Subcutaneous android fat | Subcutaneous gynoid fat | Other fat              | Fat-free mass          |
| <b>BMI, kg/m<sup>2</sup></b>               | 22.01   | 923  | 0.58 (0.55- 0.60)  | 0.65 (0.63- 0.68)        | 2.33 (2.29- 2.37)       | 11.19 ( 10.99- 11.38)  | 54.68 (54.34- 55.02)   |
|                                            | 24.51   | 925  | 0.97 (0.94- 1.00)  | 0.88 (0.86- 0.90)        | 2.93 (2.89- 2.96)       | 14.69 ( 14.51 -14.88)  | 57.50 (57.14- 57.87)   |
|                                            | 26.29   | 923  | 1.29 (1.25- 1.32)  | 1.01 (0.99- 1.03)        | 3.32 (3.28- 3.37)       | 17.10 ( 16.90 - 17.29) | 59.69 (59.31- 60.07)   |
|                                            | 28.26   | 924  | 1.69 (1.66- 1.73)  | 1.17 (1.15- 1.19)        | 3.89 (3.84- 3.94)       | 20.20 ( 19.99- 20.41)  | 61.76 (61.38- 62.15)   |
|                                            | 32.37   | 924  | 2.45 (2.40- 2.50)  | 1.53 (1.50- 1.57)        | 4.97 (4.89- 5.04)       | 26.06 ( 25.72- 26.41)  | 65.79 (65.33- 66.25)   |
| <b>Waist circumference, cm</b>             | 79.75   | 902  | 0.54 (0.52- 0.57)  | 0.62 (0.60- 0.64)        | 2.28 (2.24- 2.32)       | 10.92 (10.73- 11.11)   | 55.21 ( 54.82- 55.61)  |
|                                            | 87.20   | 843  | 0.95 (0.92- 0.97)  | 0.87 (0.83- 0.87)        | 2.88 (2.84- 3.92)       | 14.46 (14.27- 14.65)   | 57.78 ( 57.37- 58.20)  |
|                                            | 91.92   | 996  | 1.27 (1.24- 1.30)  | 1.01 (0.99- 1.03)        | 3.33 (3.29- 3.36)       | 17.08 (16.91- 17.24)   | 59.33 (58.98 - 59.68)  |
|                                            | 97.73   | 1005 | 1.70 (1.67- 1.73)  | 1.17 (1.15- 1.19)        | 3.89 (3.85- 3.94)       | 20.20 (20.01- 20.38)   | 61.47 ( 61.10- 61.84)  |
|                                            | 108.58  | 873  | 2.49 (2.44- 2.54)  | 1.59 (1.56- 1.63)        | 5.10 (5.02- 5.17)       | 26.66 (26.32- 26.99)   | 65.68 ( 65.21 - 66.16) |
| <b>Waist-to-hip ratio</b>                  | 0.83    | 924  | 0.65 (0.62- 0.68)  | 0.73 (0.70- 0.76)        | 2.65 (2.58- 2.72)       | 12.43 ( 12.13- 12.73)  | 57.93 ( 57.48- 58.39)  |
|                                            | 0.88    | 930  | 1.01 (0.97 - 1.05) | 0.95 (0.93- 0.98)        | 3.13 (3.07- 3.19)       | 15.54 ( 15.24 - 15.83) | 58.76 ( 58.32- 59.19)  |
|                                            | 0.91    | 923  | 1.32 (1.28- 1.36)  | 1.06 (1.04- 1.09)        | 3.47( 3.41- 3.54)       | 17.56 ( 17.26- 17.85)  | 59.77 ( 59.34- 60.20)  |
|                                            | 0.95    | 913  | 1.68 (1.64- 1.73)  | 1.15 (1.12- 1.18)        | 3.80 (3.73- 3.87)       | 19.89 ( 19.57- 20.21)  | 60.23 ( 59.78- 60.67)  |
|                                            | 1.00    | 929  | 2.27 (2.22- 2.33)  | 1.37 (1.33- 1.41)        | 4.40 (4.32- 4.48)       | 23.89 ( 23.47- 24.30)  | 62.61 ( 62.10- 63.12)  |
| <b>Women (n=5,641)</b>                     |         |      |                    |                          |                         |                        |                        |
| <b>BMI, kg/m<sup>2</sup></b>               | 20.339  | 1128 | 0.19 ( 0.19- 0.20) | 0.71 ( 0.70- 0.73)       | 3.11 ( 3.07- 3.15)      | 11.64 (11.49- 11.79)   | 39.74 (39.50- 39.97)   |
|                                            | 22.757  | 1128 | 0.31 ( 0.30- 0.32) | 1.05 ( 1.03- 1.06)       | 3.78 ( 3.74- 3.82)      | 14.81 (14.67- 14.95)   | 41.49 (41.25- 41.74)   |
|                                            | 24.739  | 1128 | 0.48 ( 0.47- 0.50) | 1.35 ( 1.33- 1.37)       | 4.41 ( 4.37- 4.46)      | 17.87 (17.72- 18.02)   | 42.39 (42.14- 42.63)   |
|                                            | 27.342  | 1129 | 0.72 ( 0.70- 0.74) | 1.69 ( 1.66- 1.71)       | 5.11 ( 5.06- 5.17)      | 21.51 (21.34- 21.68)   | 43.75 (43.48- 44.01)   |
|                                            | 32.876  | 1128 | 1.26 (1.23 - 1.29) | 2.39 ( 2.36- 2.43)       | 6.53 ( 6.45- 6.61)      | 29.15 (28.84- 29.45)   | 47.27 (46.97- 47.56)   |
| <b>Waist circumference, cm</b>             | 68.558  | 1171 | 0.19 ( 0.18- 0.20) | 0.73 ( 0.71 - 0.75)      | 3.29 ( 3.25- 3.34)      | 12.10 (11.94- 12.26)   | 39.82 (39.58- 40.06)   |
|                                            | 75.085  | 1043 | 0.31 ( 0.30- 0.32) | 1.07 ( 1.05- 1.09)       | 3.89 ( 3.84- 3.94)      | 15.10 (14.93- 15.28)   | 41.57 (41.31- 41.83)   |
|                                            | 80.441  | 1179 | 0.48 ( 0.47- 0.50) | 1.34 ( 1.32- 1.36)       | 4.43 (4.37- 4.48)       | 17.87 (17.68- 18.06)   | 42.34 (42.10 - 42.57)  |
|                                            | 87.143  | 1093 | 0.71 ( 0.69- 0.73) | 1.68 ( 1.65- 1.70)       | 5.05 (4.98 - 5.11)      | 21.38 (21.15- 21.60)   | 43.58 (43.32- 43.83)   |
|                                            | 100.102 | 1155 | 1.27 ( 1.24- 1.30) | 2.36 ( 2.32- 2.40)       | 6.29 ( 6.20- 6.38)      | 28.49 (28.15- 28.83)   | 47.35 (47.06- 47.64)   |
| <b>Waist-to-hip ratio</b>                  | 0.723   | 1133 | 0.27 (0.26- 0.29)  | 1.08 (1.04- 1.11)        | 4.26 ( 4.18- 4.35)      | 15.56 (15.24- 15.87)   | 41.80 (41.51 - 42.08)  |
|                                            | 0.77    | 1119 | 0.38 (0.36- 0.40)  | 1.18 (1.15- 1.22)        | 4.22 (4.14 - 4.30)      | 16.34 (16.01- 16.68)   | 42.19 (41.92 - 42.46)  |
|                                            | 0.805   | 1131 | 0.51 (0.49- 0.53)  | 1.39 (1.35 - 1.42)       | 4.50 ( 4.42- 4.59)      | 18.33 (17.98- 18.68)   | 42.32 (42.05- 42.60)   |
|                                            | 0.846   | 1130 | 0.72 (0.69- 0.74)  | 1.59 (1.55- 1.63)        | 4.79 ( 4.70- 4.88)      | 20.56 (20.17- 20.94)   | 43.34 (43.03- 43.64)   |
|                                            | 0.914   | 1128 | 1.09 (1.05- 1.13)  | 1.93 (1.89- 1.98)        | 5.16 ( 5.06- 5.25)      | 24.08 (23.66 - 24.51)  | 45.06 (44.74- 45.38)   |

Means adjusted for age (5-year groups) and qualification attainment (5 groups). Analyses in 10, 260 imaging participants; exclusions as Supplementary Table 1.

**Figure S1. Mean change in systolic blood pressure (SBP) per 1 standard deviation (SD) higher DXA-derived body composition variable in 10,260 participants including those on blood pressure lowering medication, by study and sex**

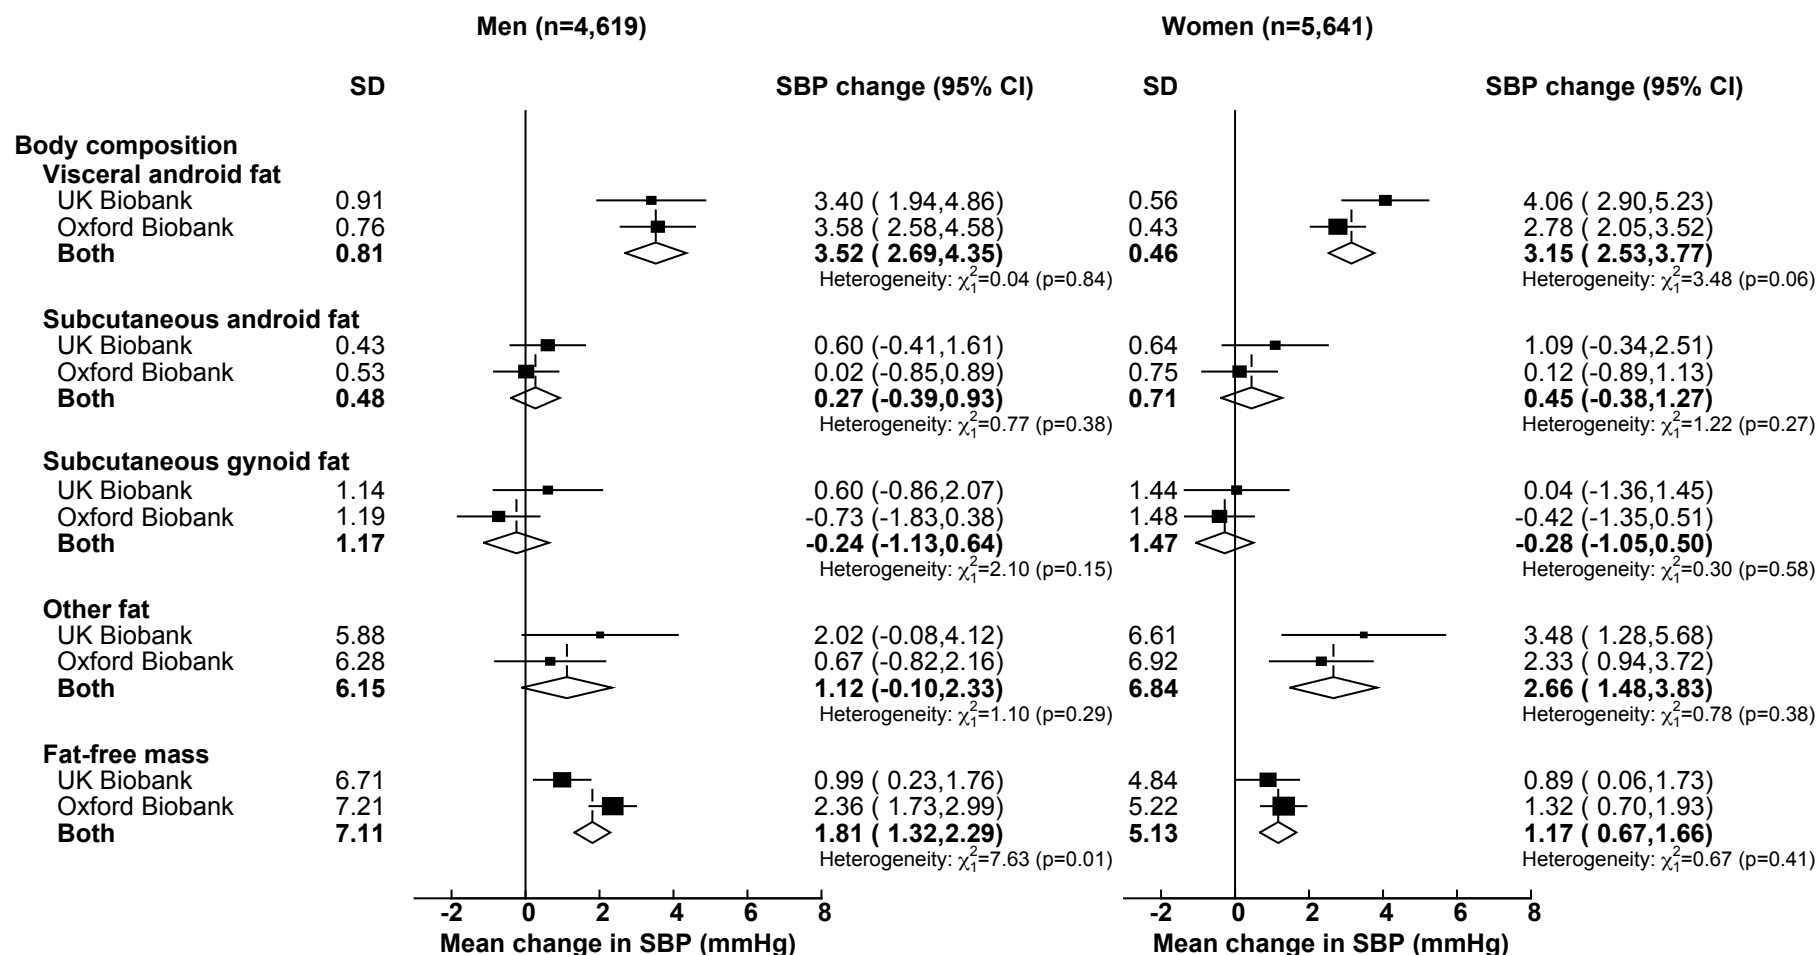

DXA = Dual energy X-ray Absorptiometry. Results presented as the mean change in SBP per standard deviation (SD) increase in DXA-derived body composition variable, adjusted for age (5-year groups), height (sex-specific fifths), education/occupation (6 groups) and alcohol consumption (5 groups). Weighted average of the study-specific SDs, with weights equal to 1 divided by the variance of the study-specific beta coefficient. Exclusions as in Supplementary Table 1.



**Figure S2. Mean change in systolic blood pressure (SBP) per 1 standard deviation (SD) higher DXA-derived body composition variables after further adjustment for smoking and physical activity, by study and sex**

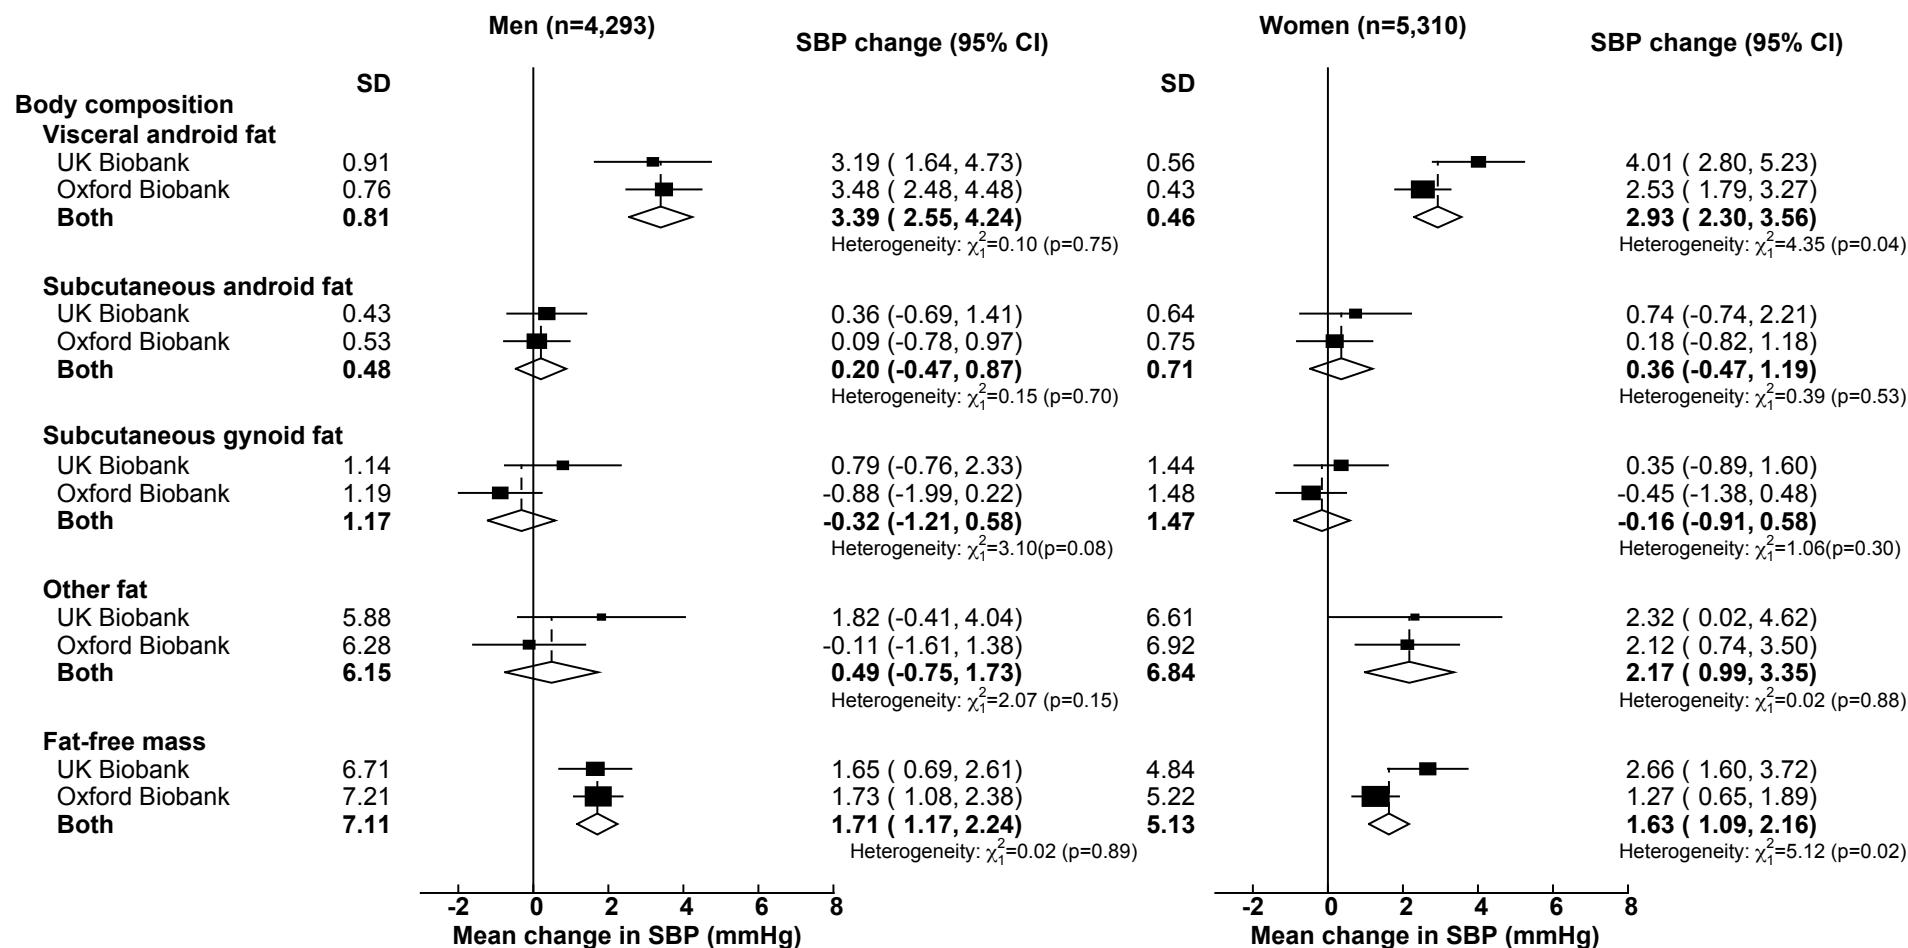

DXA= Dual energy X-ray Absorptiometry. Results presented as the mean change in SBP per standard deviation (SD) increase in DXA-derived body composition variable, adjusted for age (5-year groups), height (sex-specific fifths), education/occupation (6 groups), alcohol consumption (5 groups), physical activity (5 groups) and smoking (4 groups). Weighted average of the study-specific SDs, with weights equal to 1 divided by the variance of the study-specific beta coefficient. Exclusions as in Supplementary Table 1, with further exclusion of those on blood pressure lowering medication.

**Figure S3. Mean change in systolic blood pressure (SBP) per 1 standard deviation (SD) higher log-transformed DXA-derived body composition variables, by study and sex**

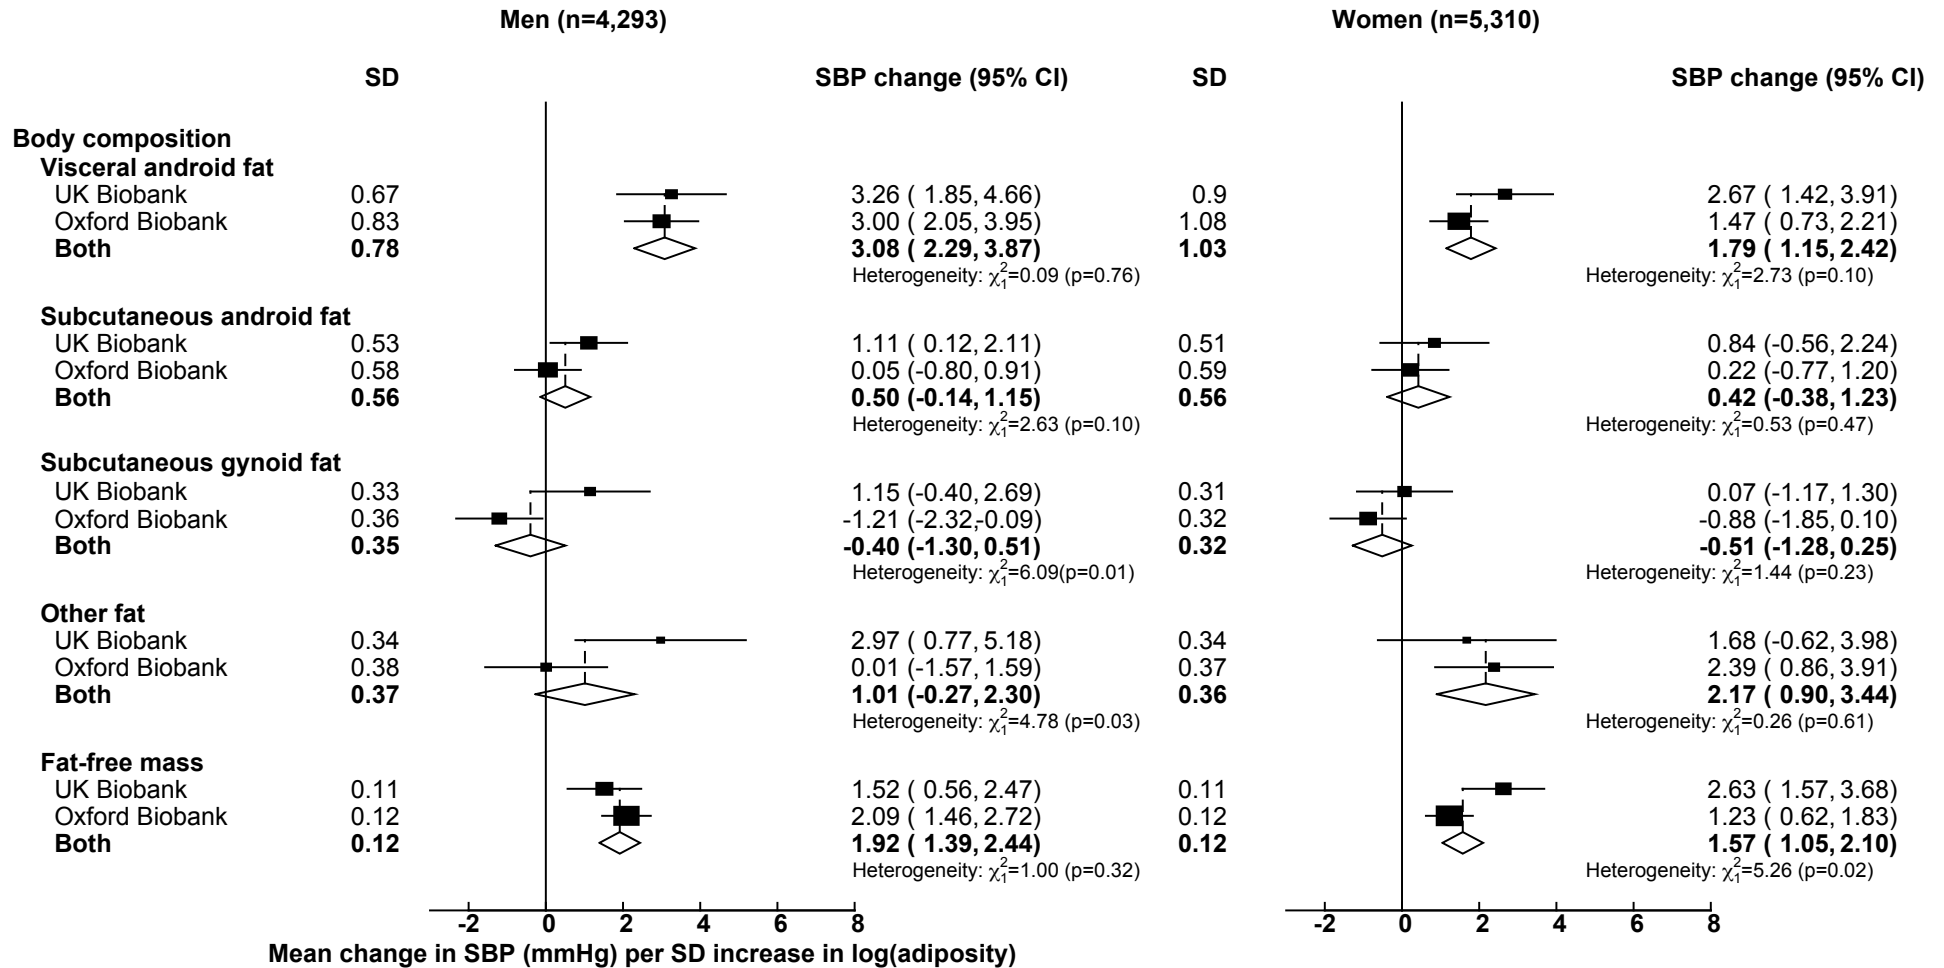

DXA= Dual energy X-ray Absorptiometry. Results presented as the mean change in SBP per standard deviation (SD) increase in the log-transformed DXA-derived body composition variable, adjusted for age (5-year groups), height (sex-specific fifths), education/occupation (6 groups) and alcohol consumption (5 groups). Weighted average of the study-specific SDs, with weights equal to 1 divided by the variance of the study-specific beta coefficient. Exclusions as in Supplementary Table 1, with further exclusion of those on blood pressure lowering medication.
